# Supplementary material for: Automated Monitoring System for Suspended Photocatalytic Batch Reactions Based on Online Circulatory Spectrophotometry
Source: MDPI journal article supplement (doi:10.3390/nano14060508), 2024-03-12
Supplement: s1 [file s1]

Supplementary Materials

Automated Monitoring System for Suspended Photocatalytic Batch Reactions Based on Online Circulatory Spectrophotometry

Da-Peng Lei <sup>1,2</sup> and Jian-Hua Huang <sup>1,\*</sup>

<sup>1</sup> Department of Chemistry, Zhejiang Sci-Tech University, Hangzhou 310018, China; photocatalyst@163.com  
<sup>2</sup> Wenzhou Quality and Technology Testing Research Institute, Wenzhou 325007, China  
\* Correspondence: jhhuang@zstu.edu.cn

Table S1. Experimental conditions and parameters for the water case studies

| Units                           | Experimental conditions and parameters | 3.1.1. Comparison of Signal Stability under Two Severe Experimental Conditions |           |             |           | 3.1.2. Analysis of the Mechanism of SNB Generation in the OCS-AMS |                                  |             |                              | 3.1.3. Influence of Parameters on the Operational Stability of the Debubbler |                         |             |                            |
|---------------------------------|----------------------------------------|--------------------------------------------------------------------------------|-----------|-------------|-----------|-------------------------------------------------------------------|----------------------------------|-------------|------------------------------|------------------------------------------------------------------------------|-------------------------|-------------|----------------------------|
|                                 |                                        | 5(a) left                                                                      | 5(a)right | 5(b) left   | 5(b)right | 6(a)                                                              | 6(b)                             | 6(c)        | 6(d)                         | 7(a-c)                                                                       | 7(d-f)                  | 7(g-i)      | 7(j-l)                     |
| Reactor unit                    | Reactor                                | Quartz photocatalytic reactor (250 mL)                                         |           |             |           | Quartz photocatalytic reactor (250 mL)                            |                                  |             |                              | Quartz photocatalytic reactor (250 mL)                                       |                         |             |                            |
|                                 | Volume of water (mL)                   | 200                                                                            |           |             |           | 200                                                               |                                  |             |                              | 200                                                                          |                         |             |                            |
|                                 | Stir bar (mm*mm)                       | A50 (17*50)                                                                    |           | B25 ( 8*25) |           | — —                                                               | A50 (17*50)                      | A50 (17*50) | B25 ( 8*25)                  | B25 ( 8*25)                                                                  | B25 ( 8*25)             | B25 ( 8*25) | A50 (17*50)                |
|                                 | Stirring speed (rpm)                   | 1400                                                                           |           | 750         |           | — —                                                               | 500, 750, 1000, 1100, 1200, 1400 | 1400        | 750                          | 750                                                                          | 750                     | 750         | 500, 750, 1000, 1200, 1400 |
|                                 | Temperature (K)                        | 295                                                                            |           | 364         |           | 295                                                               | 295                              | 295         | 295, 325, 338, 347, 355, 366 | 296                                                                          | 297, 314, 328, 343, 358 | 297         | 295                        |
| Segmented and aerated flow unit | Off time of intermittent timer (s)     | — —                                                                            |           |             |           | — —                                                               |                                  |             |                              | 1                                                                            |                         |             |                            |

| Units                   | Experimental conditions and parameters | 3.1.1. Comparison of Signal Stability under Two Severe Experimental Conditions |           |           |           | 3.1.2. Analysis of the Mechanism of SNB Generation in the OCS-AMS |      |                    |      | 3.1.3. Influence of Parameters on the Operational Stability of the Debubbler |        |                       |        |
|-------------------------|----------------------------------------|--------------------------------------------------------------------------------|-----------|-----------|-----------|-------------------------------------------------------------------|------|--------------------|------|------------------------------------------------------------------------------|--------|-----------------------|--------|
|                         |                                        | 5(a) left                                                                      | 5(a)right | 5(b) left | 5(b)right | 6(a)                                                              | 6(b) | 6(c)               | 6(d) | 7(a-c)                                                                       | 7(d-f) | 7(g-i)                | 7(j-l) |
|                         | On time of intermittent timer (s)      |                                                                                |           | --        |           |                                                                   |      | --                 |      |                                                                              |        | 59                    |        |
|                         | Delay time of aeration delay relay (s) |                                                                                |           | --        |           |                                                                   |      | --                 |      |                                                                              |        | 40                    |        |
|                         | Delay time of drainage delay relay (s) |                                                                                |           | --        |           |                                                                   |      | --                 |      |                                                                              |        | 10                    |        |
| Debubble unit           | With or without debubble unit          | without                                                                        | with      | without   | with      |                                                                   |      | without            |      |                                                                              |        | with                  |        |
|                         | Syringe volume (mL)                    | --                                                                             | 36        | --        | 65        |                                                                   |      | --                 |      | 36                                                                           | 36     | 8, 19, 28, 36, 46, 54 | 36     |
| Detection unit          | Mode                                   |                                                                                |           | Time scan |           |                                                                   |      | Time scan          |      |                                                                              |        | Time scan             |        |
|                         | TR (s)                                 |                                                                                |           | 1         |           |                                                                   |      | 1                  |      |                                                                              |        | 1                     |        |
|                         | Interval (s)                           |                                                                                |           | 1         |           |                                                                   |      | 1                  |      |                                                                              |        | 1                     |        |
|                         | Duration (s)                           |                                                                                |           | 600       |           |                                                                   |      | 600                |      |                                                                              |        | 600                   |        |
|                         | Wavelength (nm)                        |                                                                                |           | 600       |           |                                                                   |      | 600                |      |                                                                              |        | 600                   |        |
| Online circulation unit | Circulation velocity (mL/min)          |                                                                                |           | 71        |           | 18, 34, 54, 66, 71                                                | 18   | 18, 34, 54, 66, 71 | 45   | 18, 27, 34, 45, 54, 61, 66, 71                                               | 61     | 61                    | 61     |

**Table S2.** Experimental conditions and parameters for the case studies of pure solid aqueous suspensions

| Units                           | Experimental conditions and parameters | 3.2.1. Comparison with the OCS-AMS for AC Suspension with Relatively Stable Absorbance |      | 3.2.2. Comparison with the OCS-AMS for TiO <sub>2</sub> Suspension |      | 3.2.3. Three-wavelength Monitoring Results of Three Suspensions with Different TR |       |       |                  |                                 |       |                  |                  |       | 3.2.4. Three-wavelength Monitoring Results of TiO <sub>2</sub> Suspension with Different AD |       |
|---------------------------------|----------------------------------------|----------------------------------------------------------------------------------------|------|--------------------------------------------------------------------|------|-----------------------------------------------------------------------------------|-------|-------|------------------|---------------------------------|-------|------------------|------------------|-------|---------------------------------------------------------------------------------------------|-------|
|                                 |                                        | 8(a)                                                                                   | 8(b) | 9(a)                                                               | 9(b) | 10(a)                                                                             | 10(b) | 10(a) | 10(d)            | 10(e)                           | 10(f) | 10(g)            | 10(h)            | 10(i) | 11(a)                                                                                       | 11(b) |
| Reactor unit                    | Reactor                                | Quartz photocatalytic reactor (250 mL)                                                 |      |                                                                    |      |                                                                                   |       |       |                  |                                 |       |                  |                  |       |                                                                                             |       |
|                                 | volume of water (mL)                   | 200                                                                                    |      | 200                                                                |      | 200                                                                               |       |       |                  | 200                             |       |                  | 200              |       | 200                                                                                         |       |
|                                 | Solid particles                        | AC                                                                                     |      | TiO <sub>2</sub>                                                   |      | AC                                                                                |       |       |                  | g-C <sub>3</sub> N <sub>4</sub> |       |                  | TiO <sub>2</sub> |       | TiO <sub>2</sub>                                                                            |       |
|                                 | Mass concentration (mg/L)              | 150                                                                                    |      | 50                                                                 |      | 150                                                                               |       |       |                  | 150                             |       |                  | 150              |       | 50                                                                                          |       |
|                                 | Stir bar (mm*mm)                       | B25 ( 8*25)                                                                            |      | B25 ( 8*25)                                                        |      | B25 ( 8*25)                                                                       |       |       |                  | B25 ( 8*25)                     |       |                  | B25 ( 8*25)      |       | B25 ( 8*25)                                                                                 |       |
|                                 | Stirring speed (rpm)                   | 750                                                                                    |      | 750                                                                |      | 750                                                                               |       |       |                  | 750                             |       |                  | 750              |       | 750                                                                                         |       |
|                                 | Temperature (K)                        | Room temperature                                                                       |      | Room temperature                                                   |      | Room temperature                                                                  |       |       | Room temperature |                                 |       | Room temperature |                  |       | Room temperature                                                                            |       |
| Segmented and aerated flow unit | Off time of intermittent timer (s)     | 1                                                                                      |      | 1                                                                  |      | 1741                                                                              | 241   | 1     | 1741             | 241                             | 1     | 1741             | 241              | 1     | 61                                                                                          |       |
|                                 | On time of intermittent timer (s)      | 59                                                                                     |      | 59                                                                 |      |                                                                                   | 59    |       |                  | 59                              |       |                  | 59               |       | 59                                                                                          |       |
|                                 | Delay time of aeration delay relay (s) | 40                                                                                     |      | 40                                                                 |      |                                                                                   | 40    |       |                  | 40                              |       |                  | 40               |       | 40                                                                                          |       |
|                                 | Delay time of drainage delay relay (s) | 10                                                                                     |      | 10                                                                 |      |                                                                                   | 10    |       |                  | 10                              |       |                  | 10               |       | 10                                                                                          | 20    |
|                                 |                                        |                                                                                        |      |                                                                    |      |                                                                                   |       |       |                  |                                 |       |                  |                  |       |                                                                                             |       |
| Debubble unit                   | With or without debubble unit          | Without                                                                                | With | Without                                                            | With | With                                                                              |       |       |                  | With                            |       |                  | With             |       | With                                                                                        |       |

| Units                   | Experimental conditions and parameters | 3.2.1. Comparison with the OCS-AMS for AC Suspension with Relatively Stable Absorbance |      | 3.2.2. Comparison with the OCS-AMS for TiO <sub>2</sub> Suspension |      | 3.2.3. Three-wavelength Monitoring Results of Three Suspensions with Different TR |        |       |                         |        |       |                         |        |       | 3.2.4. Three-wavelength Monitoring Results of TiO <sub>2</sub> Suspension with Different AD |       |
|-------------------------|----------------------------------------|----------------------------------------------------------------------------------------|------|--------------------------------------------------------------------|------|-----------------------------------------------------------------------------------|--------|-------|-------------------------|--------|-------|-------------------------|--------|-------|---------------------------------------------------------------------------------------------|-------|
|                         |                                        | 8(a)                                                                                   | 8(b) | 9(a)                                                               | 9(b) | 10(a)                                                                             | 10(b)  | 10(a) | 10(d)                   | 10(e)  | 10(f) | 10(g)                   | 10(h)  | 10(i) | 11(a)                                                                                       | 11(b) |
|                         | Syringe volume (mL)                    | ——                                                                                     | 10   | ——                                                                 | 10   | 10                                                                                |        |       | 10                      |        |       | 10                      |        |       | 36                                                                                          |       |
| Detection unit          | Mode                                   | Photometric measurement                                                                |      | Photometric measurement                                            |      | Photometric measurement                                                           |        |       | Photometric measurement |        |       | Photometric measurement |        |       | Photometric measurement                                                                     |       |
|                         | TR (min)                               | 1                                                                                      |      | 1                                                                  |      | 30                                                                                | 5      | 1     | 30                      | 5      | 1     | 30                      | 5      | 1     | 2                                                                                           |       |
|                         | Interval (s)                           | 44.64                                                                                  |      | 45.20                                                              |      | 1784.64                                                                           | 284.64 | 44.64 | 1785.20                 | 285.20 | 45.20 | 1784.36                 | 284.36 | 44.36 | 104.36                                                                                      |       |
|                         | Duration (min)                         | 180                                                                                    |      | 400                                                                |      | 240                                                                               |        |       | 240                     |        |       | 240                     |        |       | 185                                                                                         |       |
|                         | Wavelengths (nm)                       | 665, 765, 900                                                                          |      | 485, 600, 700                                                      |      | 665, 765, 900                                                                     |        |       | 485, 600, 700           |        |       | 554, 615, 800           |        |       | 554, 615, 800                                                                               |       |
| Online circulation unit | Circulation velocity (mL/min)          | 45                                                                                     |      | 45                                                                 |      | 45                                                                                |        |       | 45                      |        |       | 45                      |        |       | 61                                                                                          |       |

**Table S3.** Experimental conditions and parameters for the case studies of the photocatalytic degradation of AOII by TiO<sub>2</sub>

| Units                           | Experimental conditions and parameters        | 3.3.1. Results under Visible Illumination |                 | 3.3.2. Results under UV Illumination   |                 |
|---------------------------------|-----------------------------------------------|-------------------------------------------|-----------------|----------------------------------------|-----------------|
|                                 |                                               | 12(a) and 12(c)                           | 12(b) and 12(d) | 13(a) and 13(c)                        | 13(b) and 13(d) |
| Reactor unit                    | Reactor                                       | Four-necked glass flask (250 mL)          |                 | Quartz photocatalytic reactor (250 mL) |                 |
|                                 | Volume of water (mL)                          | 199                                       |                 | 199                                    |                 |
|                                 | Solid particles                               | TiO <sub>2</sub>                          |                 | TiO <sub>2</sub>                       |                 |
|                                 | Mass concentration of solid particles (mg/L)  | 50                                        |                 | 50                                     |                 |
|                                 | Substrate                                     | AOII                                      |                 | AOII                                   |                 |
|                                 | Volume of substrate stock solution added (mL) | 1.00                                      |                 | 1.00                                   |                 |
|                                 | Mass concentration of substrate (mg/L)        | 10                                        |                 | 10                                     |                 |
|                                 | Stir bar (mm*mm)                              | B25 ( 8*25)                               |                 | B25 ( 8*25)                            |                 |
|                                 | Stirring speed (rpm)                          | 750                                       |                 | 750                                    |                 |
|                                 | Temperature (K)                               | 303                                       |                 | Room temperature                       |                 |
|                                 | Light source                                  | 4 visible LED lamps                       |                 | 1 UV LED lamp                          |                 |
| Segmented and aerated flow unit | Dark adsorption time (min)                    | 60                                        |                 | 60                                     |                 |
|                                 | Off time of intermittent timer (s)            | ---                                       | 1470            | ---                                    | 1470            |
|                                 | On time of intermittent timer (s)             | ---                                       | 330             | ---                                    | 330             |
|                                 | Delay time of aeration delay relay (s)        | ---                                       | 250             | ---                                    | 250             |
|                                 | Delay time of drainage delay relay (s)        | ---                                       | 60              | ---                                    | 60              |
| Debubble unit                   | With or without debubble unit                 | Without                                   | With            | Without                                | With            |
|                                 | Syringe volume (mL)                           | ---                                       | 36              | ---                                    | 36              |
| Detection unit                  | Mode                                          | Spectral scan                             |                 | Spectral scan                          | Spectral scan   |
|                                 | TR (min)                                      | 30                                        |                 | 30                                     | 30              |
|                                 | Interval (s)                                  | 1600                                      |                 | 1600                                   |                 |
|                                 | Duration (min)                                | 1351                                      |                 | 1381                                   |                 |
|                                 | Wavelengths (nm)                              | 200 ~ 900                                 |                 | 200 ~ 900                              |                 |
| Online circulation unit         | Circulation velocity (mL/min)                 | 61                                        |                 | 61                                     |                 |
